# Supplementary material
Source: ML conference proceedings conference paper supplement (https://openaccess.thecvf.com/content/WACV2024/html/Lee_HELA-VFA_A_Hellinger_WACV_2024_paper.html)
Supplement: Supplementary file 1 [file Lee_HELA-VFA_A_Hellinger_WACV_2024_supplemental.pdf]

# HELA-VFA: A Hellinger Distance-Attention-based Feature Aggregation Network for Few-Shot Classification

Gao Yu Lee, Tanmoy Dam, Daniel Puiu Poenar, Vu N. Duong  
Nanyang Technological University (NTU), Singapore  
{GAOYU001, tanmoy.dam, EPDPuiu, vu.duong}@ntu.edu.sg

Md Meftahul Ferdaus  
University of New Orleans, USA  
ferdaus57@gmail.com

In this supplementary material a mathematical derivation of equation (7) in the main paper, ‘‘HELA-VFA: A Hellinger Distance-Attention-based Feature Aggregation Network for Few Shot Classification’’ is provided, which relates the Evidence Lower Bound (ELBO) with the evidence term  $\int \log(p_\theta(\mathcal{T}))dz$  and the Hellinger distance  $D_H$ .

## 1. Mathematical Derivation

Recall in the paper that the ELBO can be written as

$$ELBO = \int q_\phi(z|\mathcal{S}) \log \left( \frac{p_\theta(\mathcal{T}, z)}{q_\phi(z|\mathcal{S})} \right) dz. \quad (1)$$

and that the square of  $D_H$  is written as

$$D_H^2 = 1 - \int \left( \sqrt{p_\theta(z|\mathcal{T})q_\phi(z|\mathcal{S})} \right) dz. \quad (2)$$

Exchanging the positions of the terms on both sides and taking the logarithm of the terms,

$$\log \int \left( \sqrt{p_\theta(z|\mathcal{T})q_\phi(z|\mathcal{S})} \right) dz = \log(1 - D_H^2). \quad (3)$$

Inserting the logarithm inside the integral on the left-hand side while bringing out the factor of  $\frac{1}{2}$  and moving it to the term on the right-hand side,

$$\int \log(p_\theta(z|\mathcal{T})q_\phi(z|\mathcal{S})) dz = 2\log(1 - D_H^2). \quad (4)$$

Noting that  $\log(p_\theta(z|\mathcal{T})q_\phi(z|\mathcal{S})) = \log(p_\theta(z|\mathcal{T})) + \log(q_\phi(z|\mathcal{S}))$ , the left-hand side becomes

$$\int \log(p_\theta(z|\mathcal{T}))dz + \int \log(q_\phi(z|\mathcal{S}))dz = 2\log(1 - D_H^2). \quad (5)$$

Inserting the positive and negative of the evidence term on the left-hand side:

$$\begin{aligned} & \int \log(p_\theta(z|\mathcal{T}))dz + \int \log(q_\phi(z|\mathcal{S}))dz \\ & + \int \log(p_\theta(\mathcal{T}))dz - \int \log(p_\theta(\mathcal{T}))dz \quad (6) \\ & = 2\log(1 - D_H^2), \end{aligned}$$

the following is obtained,

$$\begin{aligned} & \int \log(p_\theta(z, \mathcal{T}))dz + \int \log \left( \frac{q_\phi(z|\mathcal{S})}{p_\theta(\mathcal{T})} \right) dz \quad (7) \\ & = 2\log(1 - D_H^2), \end{aligned}$$

where  $p_\theta(z, \mathcal{T}) = p_\theta(z|\mathcal{T})p_\theta(\mathcal{T})$ . Inserting  $\frac{q_\phi(z|\mathcal{S})}{q_\phi(z|\mathcal{S})}$  in the parenthesis of  $\log(p_\theta(z, \mathcal{T}))$  and expanding the logarithm,

$$\begin{aligned} & \int \log \left( \frac{p_\theta(z, \mathcal{T})}{q_\phi(z|\mathcal{S})} \right) dz + \int \log \left( \frac{q_\phi^2(z|\mathcal{S})}{p_\theta(\mathcal{T})} \right) dz \quad (8) \\ & = 2\log(1 - D_H^2), \end{aligned}$$

where the second term on the left can be expanded out to obtain

$$\begin{aligned} & \int \log \left( \frac{p_\theta(z, \mathcal{T})}{q_\phi(z|\mathcal{S})} \right) dz + 2 \int \log(q_\phi(z|\mathcal{S}))dz \quad (9) \\ & - \int \log(p_\theta(\mathcal{T}))dz = 2\log(1 - D_H^2). \end{aligned}$$

Inserting the fraction  $\frac{p_\theta(z, \mathcal{T})}{p_\theta(z, \mathcal{T})}$  in the parenthesis of  $\log(q_\phi(z|\mathcal{S}))$ , the term  $2 \int \log(q_\phi(z|\mathcal{S}))dz$  can be written as

$$\begin{aligned} & 2 \int \log(q_\phi(z|\mathcal{S}))dz = 2 \int \log(p_\theta(z, \mathcal{T}))dz \\ & + 2 \int \log \left( \frac{q_\phi(z|\mathcal{S})}{p_\theta(z, \mathcal{T})} \right) dz \quad (10) \end{aligned}$$

in which the second term on the right is the inverse, and consequently, the negative of the twice of the integral of the ELBO logarithmic term, i.e.,  $-2 \int \log \left( \frac{p_\theta(z, \mathcal{T})}{q_\phi(z|\mathcal{S})} \right) dz$ . Therefore

$$\begin{aligned} & \int \log \left( \frac{p_\theta(z, \mathcal{T})}{q_\phi(z|\mathcal{S})} \right) dz - 2 \int \log \left( \frac{p_\theta(z, \mathcal{T})}{q_\phi(z|\mathcal{S})} \right) \\ & + 2 \int \log(p_\theta(z, \mathcal{T})) dz - \int \log(p_\theta(\mathcal{T})) dz \quad (11) \\ & = 2 \log(1 - D_H^2). \end{aligned}$$

$p_\theta(z, \mathcal{T}) = p_\theta(z|\mathcal{T})p_\theta(\mathcal{T})$  is utilized again, this time on the  $\log(p_\theta(z, \mathcal{T}))$  term, to obtain

$$\begin{aligned} & - \int \log \left( \frac{p_\theta(z, \mathcal{T})}{q_\phi(z|\mathcal{S})} \right) dz + 2 \int \log(p_\theta(z|\mathcal{T})p_\theta(\mathcal{T})) dz \\ & - \int \log(p_\theta(\mathcal{T})) dz = 2 \log(1 - D_H^2), \quad (12) \end{aligned}$$

in which the second term can be expanded out to obtain

$$\begin{aligned} & - \int \log \left( \frac{p_\theta(z, \mathcal{T})}{q_\phi(z|\mathcal{S})} \right) dz + 2 \int \log(p_\theta(z|\mathcal{T})) dz \\ & + 2 \int \log(p_\theta(\mathcal{T})) dz - \int \log(p_\theta(\mathcal{T})) dz = 2 \log(1 - D_H^2). \quad (13) \end{aligned}$$

Now, using the fact that  $p_\theta(z|\mathcal{T}) = \frac{p_\theta(z, \mathcal{T})}{p_\theta(\mathcal{T})}$ , the  $\log(p_\theta(z|\mathcal{T}))$  term can be written as  $\log \left( \frac{p_\theta(z, \mathcal{T})}{p_\theta(\mathcal{T})} \right)$ , which then along with the other terms, can be expressed as

$$\begin{aligned} & - \int \log \left( \frac{p_\theta(z, \mathcal{T})}{q_\phi(z|\mathcal{S})} \right) dz + 2 \int \log \left( \frac{p_\theta(z, \mathcal{T})}{p_\theta(\mathcal{T})} \right) dz \\ & + \int \log(p_\theta(\mathcal{T})) dz = 2 \log(1 - D_H^2), \quad (14) \end{aligned}$$

$$\begin{aligned} & - \int \log \left( \frac{p_\theta(z, \mathcal{T})}{q_\phi(z|\mathcal{S})} \right) dz + 2 \int \log(p_\theta(z, \mathcal{T})) dz \\ & - \int \log(p_\theta(\mathcal{T})) dz = 2 \log(1 - D_H^2), \quad (15) \end{aligned}$$

$$\begin{aligned} & - \int \log \left( \frac{p_\theta(z, \mathcal{T})}{q_\phi(z|\mathcal{S})} \right) dz + 2 \int \log(p_\theta(z, \mathcal{T})) dz = \\ & \int \log(p_\theta(\mathcal{T})) dz + 2 \log(1 - D_H^2). \quad (16) \end{aligned}$$

Finally, noting the observation that  $\int \log \left( \frac{p_\theta(z, \mathcal{T})}{q_\phi(z|\mathcal{S})} \right) dz$  can be rewritten in terms of ELBO and  $q_\phi(z|\mathcal{S})$  as

$$\begin{aligned} \int \log \left( \frac{p_\theta(z, \mathcal{T})}{q_\phi(z|\mathcal{S})} \right) dz &= \int \left( \frac{1}{q_\phi(z|\mathcal{S})} \frac{d(ELBO)}{dz} \right) dz \\ &= \frac{1}{q_\phi(z|\mathcal{S})} ELBO, \quad (17) \end{aligned}$$

the following is derived:

$$ELBO' = \int \log(p_\theta(\mathcal{T})) dz + \log(1 - D_H^2)^2 \quad (18)$$

where  $ELBO' = \frac{ELBO}{q_\phi(z|\mathcal{S})}$ .
